# Supplementary material for: Human Milk from Previously COVID-19-Infected Mothers: The Effect of Pasteurization on Specific Antibodies and Neutralization Capacity
Source: MDPI journal article supplement (doi:10.3390/nu13051645), 2021-05-13
Supplement: s1 [file s1]

Supplementary Materials

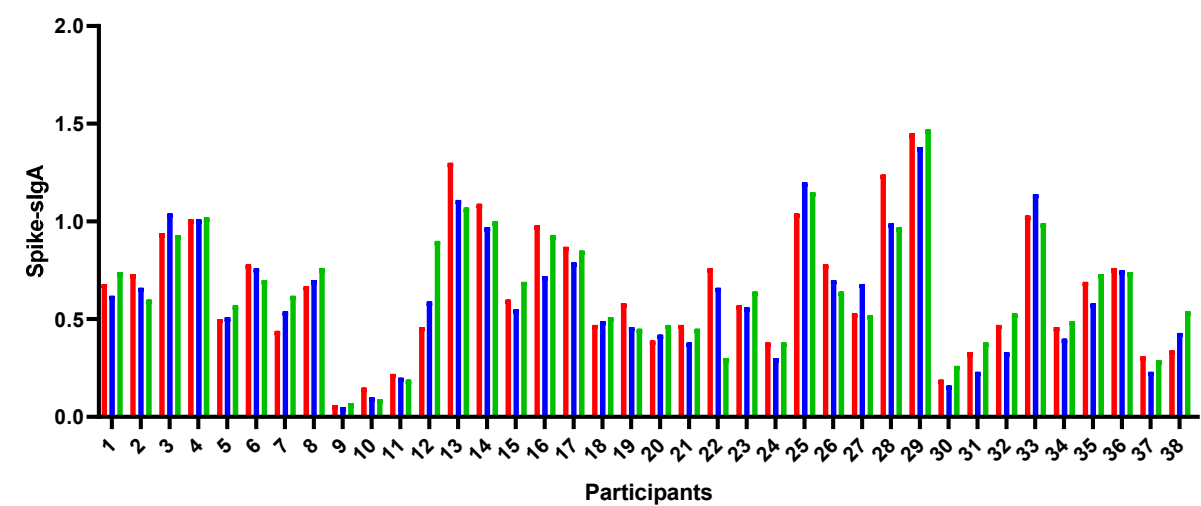

Figure S1. Spike IgA in human milk. Individual Spike IgA levels in UP milk (red), HPP milk (blue) and HoP milk (green).

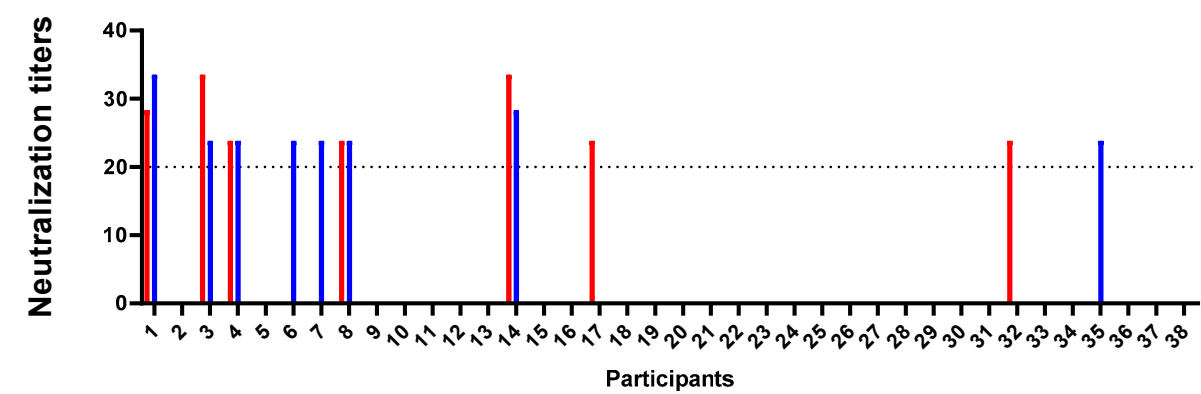

Figure S2. SARS-CoV-2 neutralizing capacity of human milk of a clinical isolate. Neutralization capacity in individual participants of UP milk (red), HPP milk (blue) and HoP milk (green).
